# Supplementary material for: Fast and automated identification of reactions with low barriers using meta-MD simulations
Source: PeerJ journal article supplement (doi:10.7717/peerj-pchem.22), 2022-03-16
Supplement: metaMD_SI_R1.pdf [file metaMD_SI_R1.pdf]

# Supporting Information

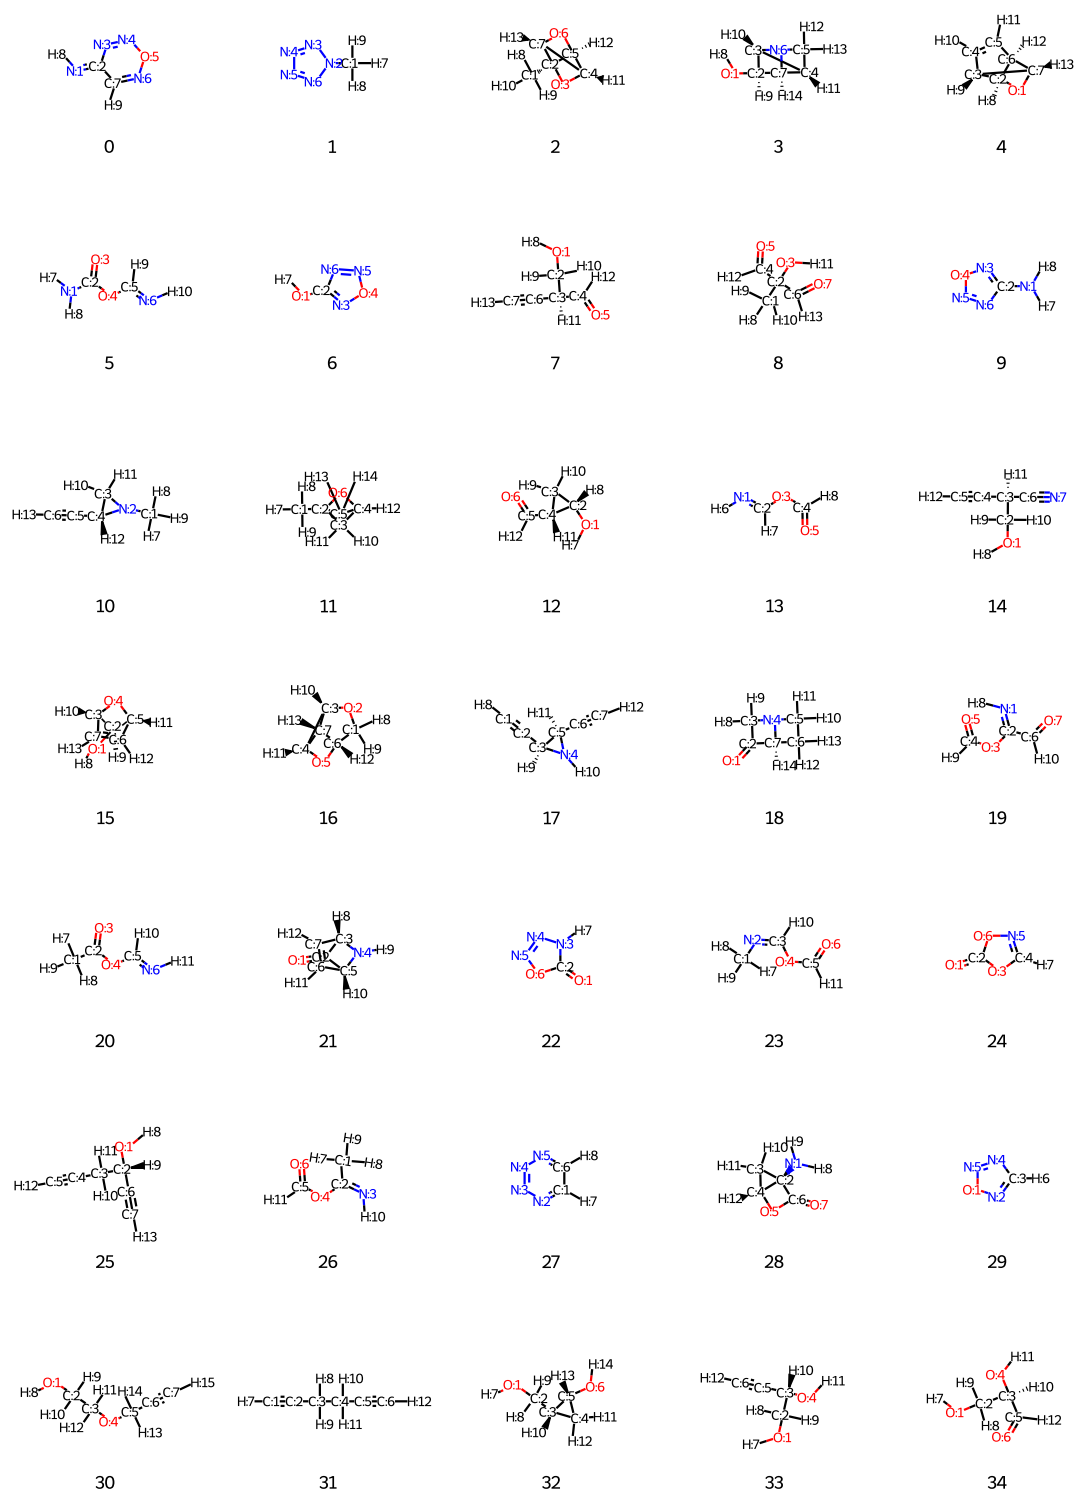

Figure S1: 163 reactants tested - part 1

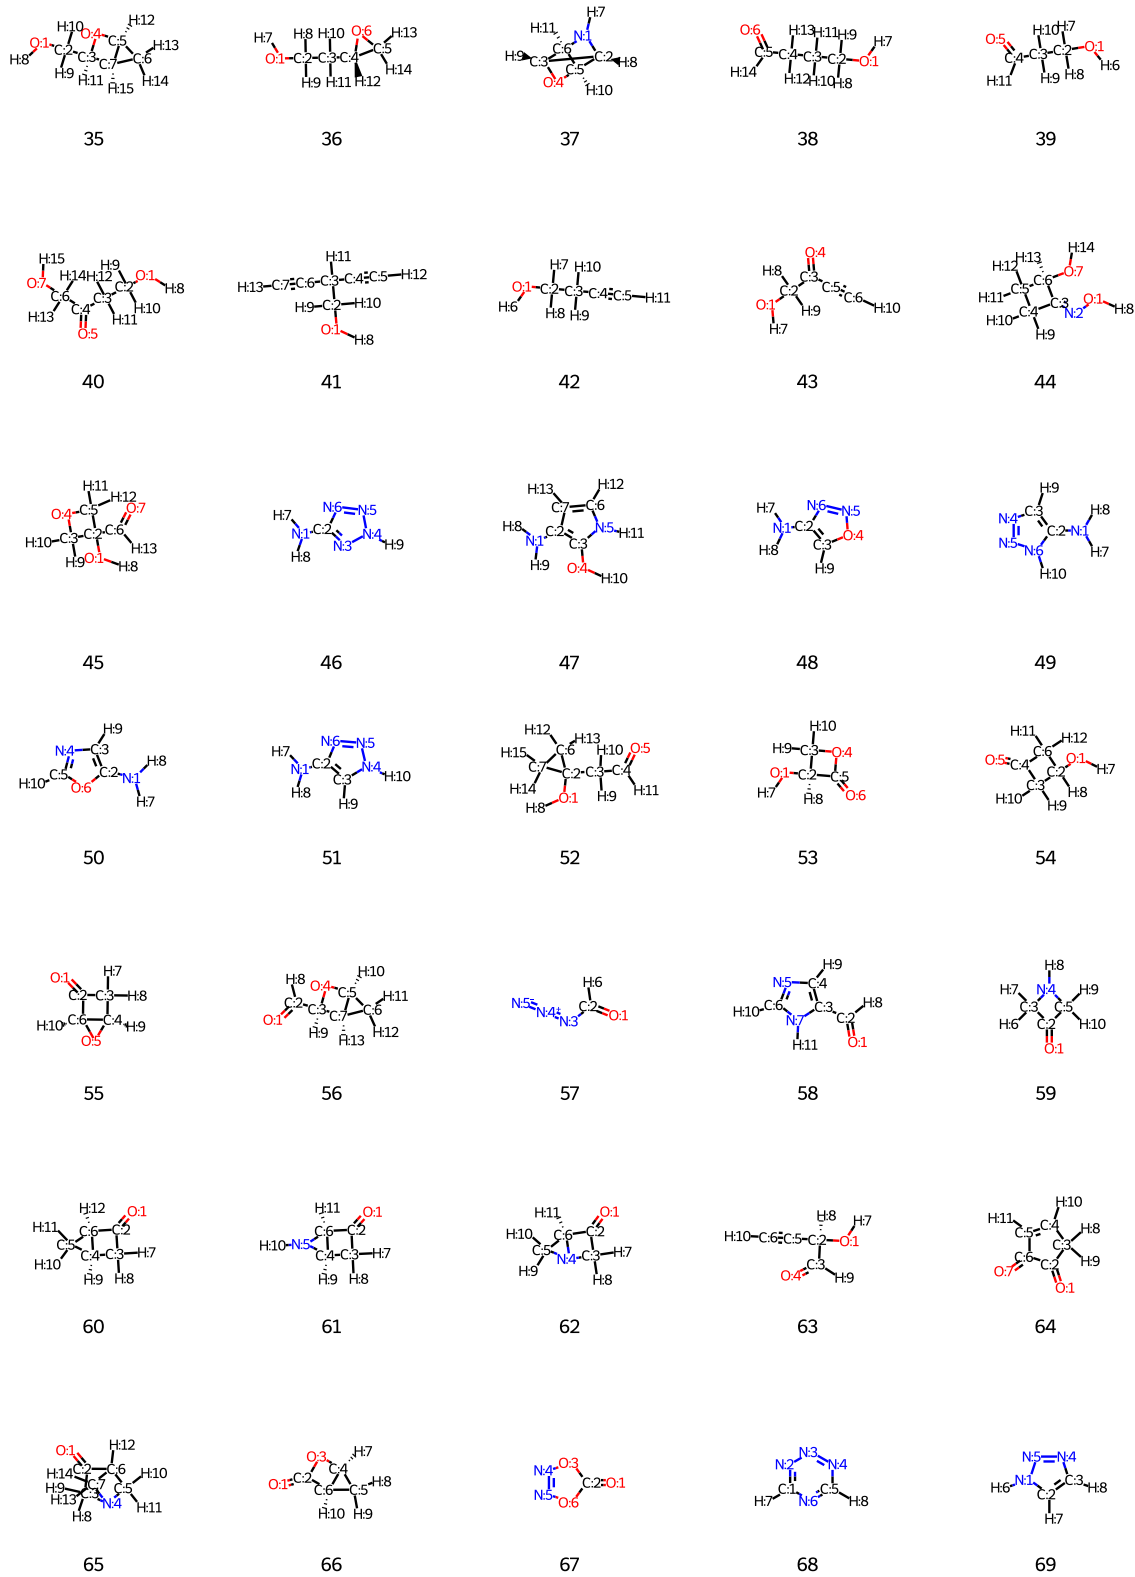

Figure S1: 163 reactants tested - part 2

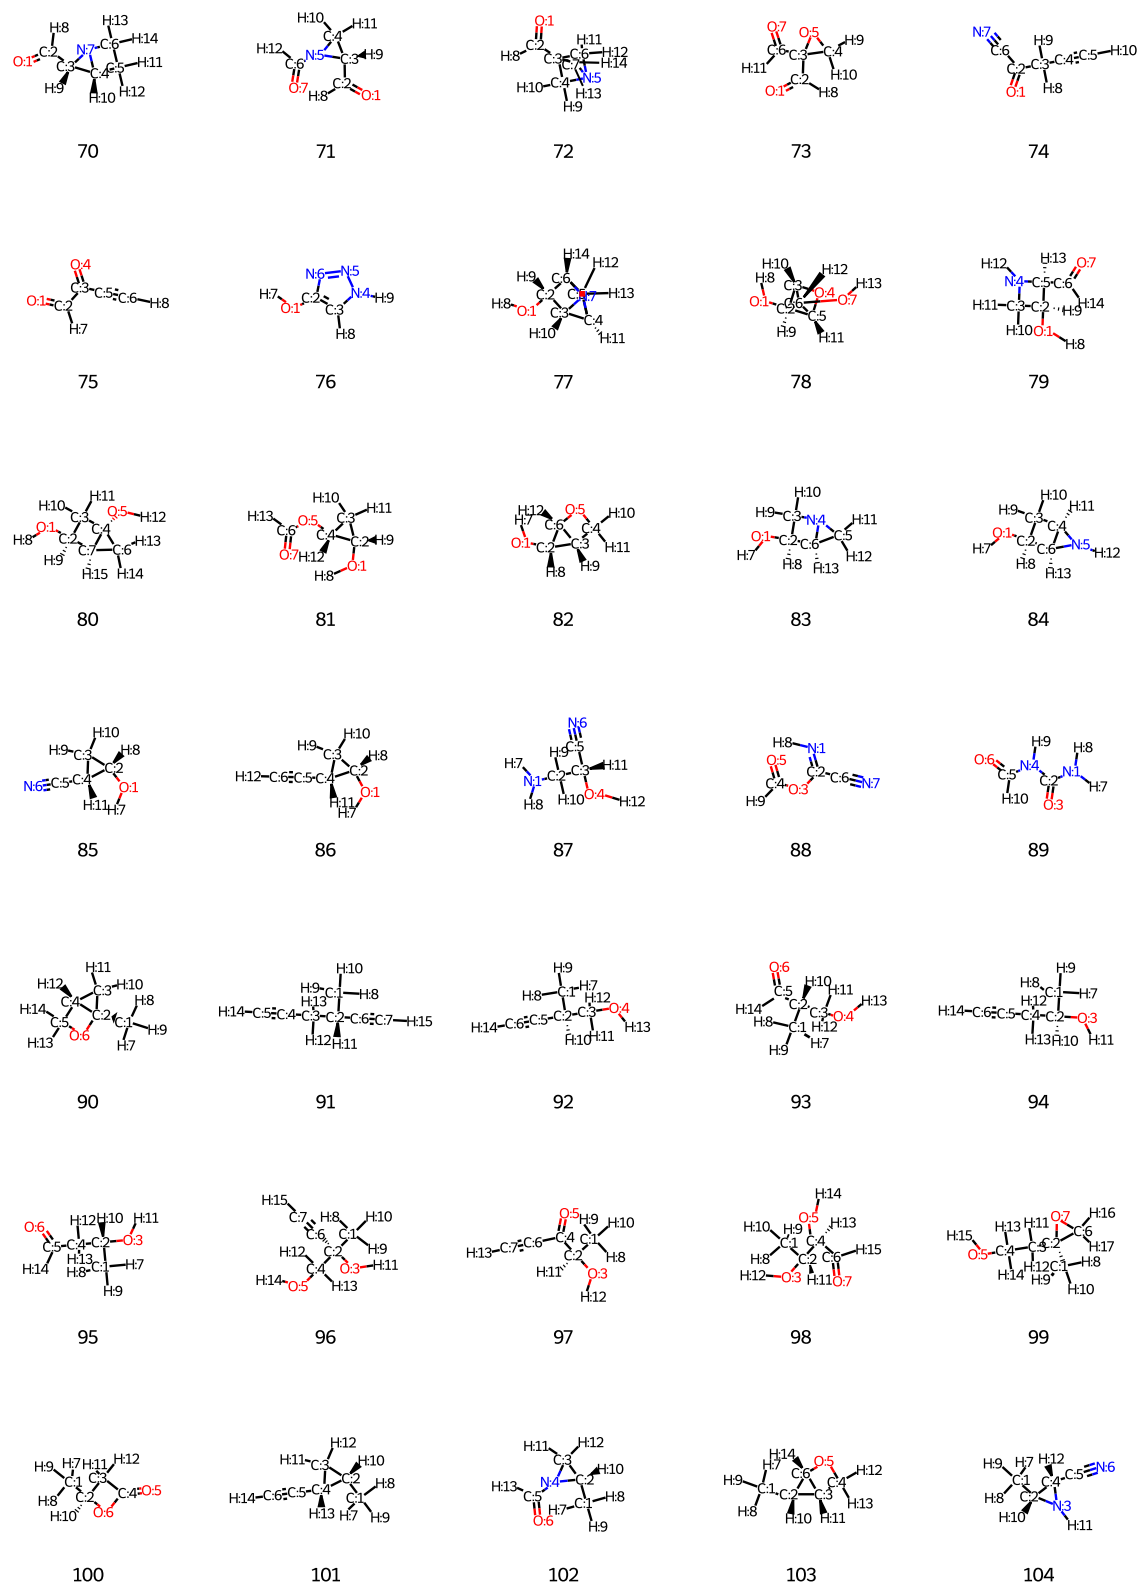

Figure S1: 163 reactants tested - part 3

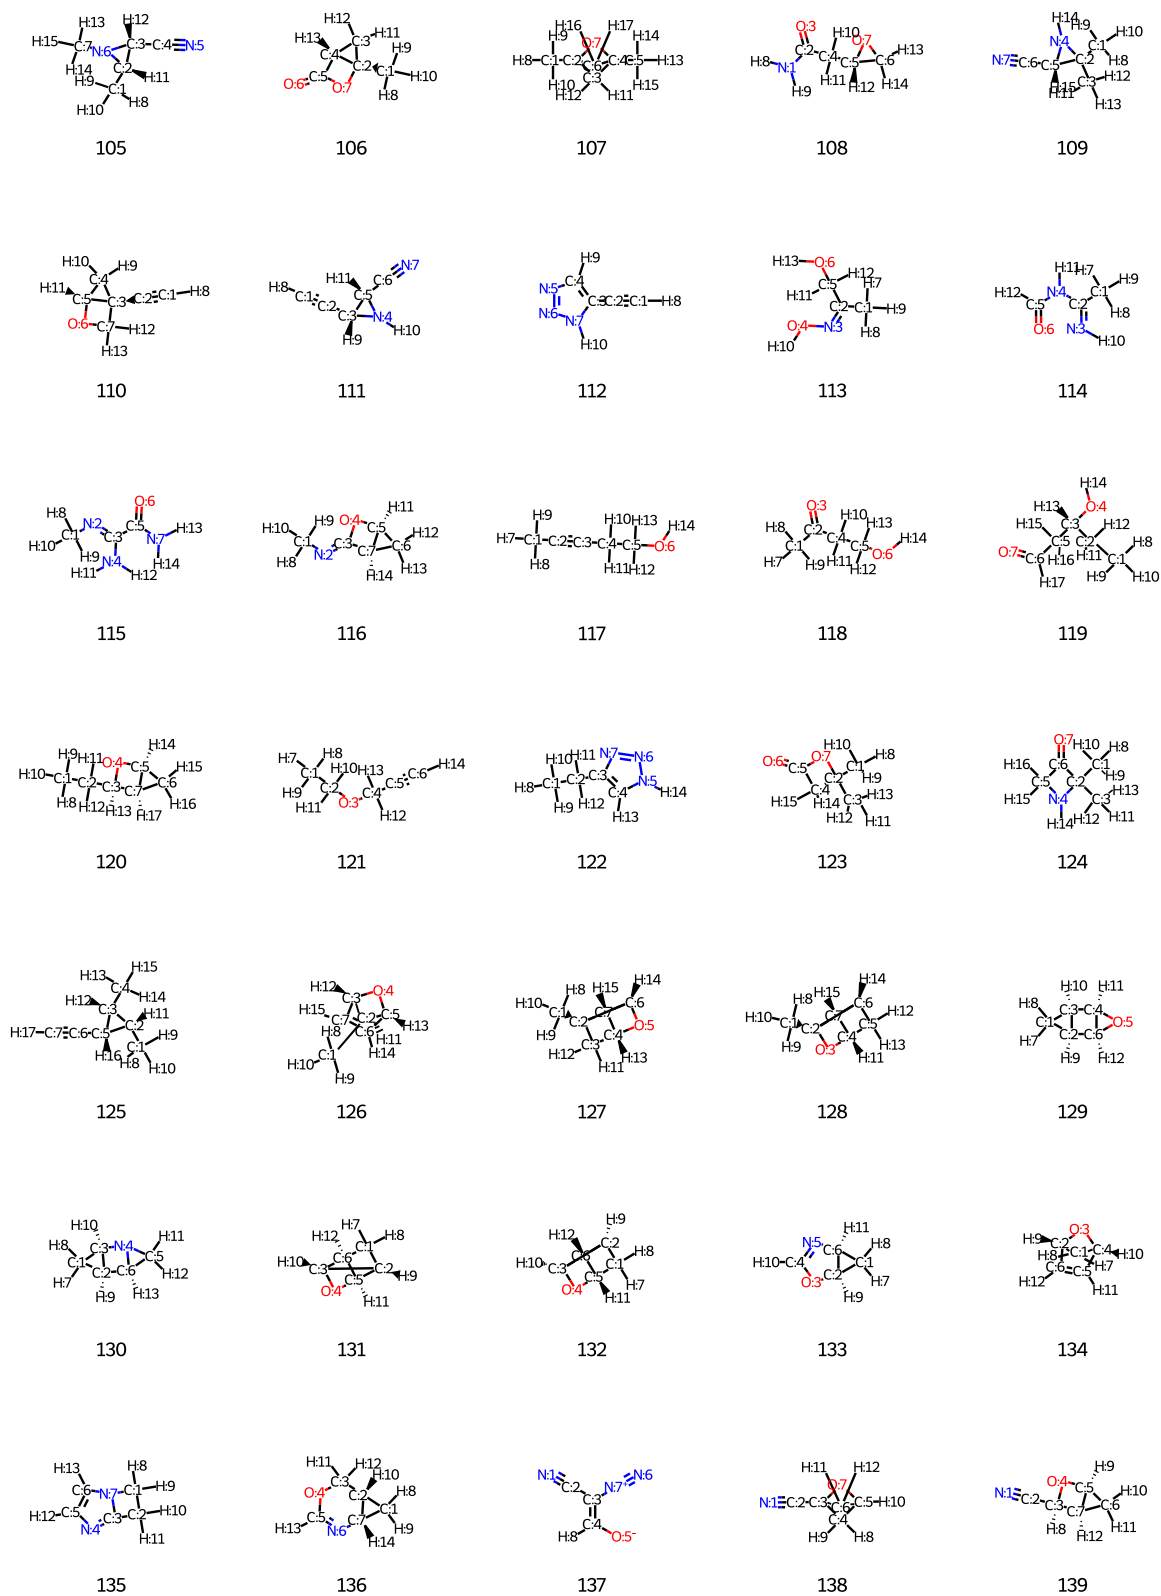

Figure S1: 163 reactants tested - part 4

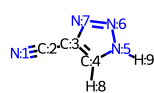

140

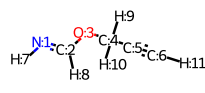

141

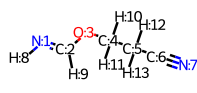

142

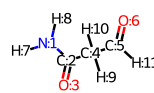

143

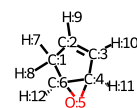

144

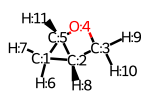

145

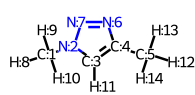

146

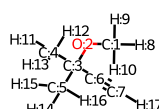

147

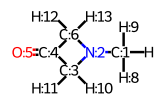

148

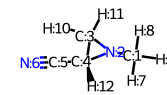

149

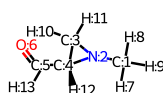

150

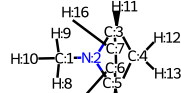

151

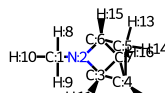

152

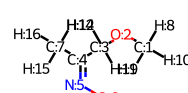

153

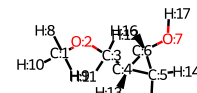

154

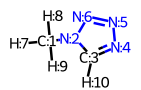

155

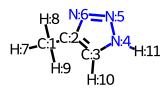

156

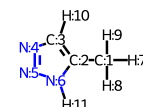

157

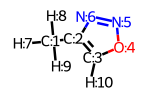

158

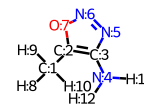

159

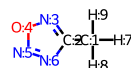

160

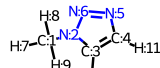

161

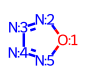

162

Figure S1: 163 reactants tested - part 5

| R <sub>ID</sub> | Reactant | Energetics                                                     | Reaction |
|-----------------|----------|----------------------------------------------------------------|----------|
| R1084           | 89       | $\Delta E^\ddagger = 28$ kcal/mol<br>$\Delta E = 8$ kcal/mol   |          |
| R1108           | 26       | $\Delta E^\ddagger = 21$ kcal/mol<br>$\Delta E = -13$ kcal/mol |          |
| R1110           | 26       | $\Delta E^\ddagger = 20$ kcal/mol<br>$\Delta E = -8$ kcal/mol  |          |
| R1334           | 20       | $\Delta E^\ddagger = 26$ kcal/mol<br>$\Delta E = -16$ kcal/mol |          |
| R1689           | 5        | $\Delta E^\ddagger = 15$ kcal/mol<br>$\Delta E = -5$ kcal/mol  |          |
| R1957           | 13       | $\Delta E^\ddagger = 29$ kcal/mol<br>$\Delta E = -13$ kcal/mol |          |
| R1958           | 13       | $\Delta E^\ddagger = 25$ kcal/mol<br>$\Delta E = -18$ kcal/mol |          |
| R2399           | 23       | $\Delta E^\ddagger = 21$ kcal/mol<br>$\Delta E = -19$ kcal/mol |          |

|       |     |                                                                                |                                                                                      |
|-------|-----|--------------------------------------------------------------------------------|--------------------------------------------------------------------------------------|
| R2514 | 6   | $\Delta E^\ddagger = 23 \text{ kcal/mol}$<br>$\Delta E = -3 \text{ kcal/mol}$  | 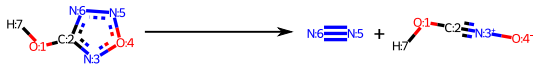   |
| R2523 | 114 | $\Delta E^\ddagger = 30 \text{ kcal/mol}$<br>$\Delta E = -2 \text{ kcal/mol}$  |    |
| R2552 | 67  | $\Delta E^\ddagger = 16 \text{ kcal/mol}$<br>$\Delta E = -49 \text{ kcal/mol}$ |    |
| R3096 | 22  | $\Delta E^\ddagger = 19 \text{ kcal/mol}$<br>$\Delta E = -24 \text{ kcal/mol}$ |    |
| R3504 | 27  | $\Delta E^\ddagger = 25 \text{ kcal/mol}$<br>$\Delta E = 8 \text{ kcal/mol}$   |   |
| R3648 | 61  | $\Delta E^\ddagger = 29 \text{ kcal/mol}$<br>$\Delta E = -3 \text{ kcal/mol}$  |  |
| R3725 | 29  | $\Delta E^\ddagger = 17 \text{ kcal/mol}$<br>$\Delta E = -21 \text{ kcal/mol}$ |  |
| R4612 | 49  | $\Delta E^\ddagger = 26 \text{ kcal/mol}$<br>$\Delta E = 13 \text{ kcal/mol}$  |  |
| R4808 | 66  | $\Delta E^\ddagger = 26 \text{ kcal/mol}$<br>$\Delta E = -10 \text{ kcal/mol}$ |  |

|       |     |                                                                                |  |
|-------|-----|--------------------------------------------------------------------------------|--|
| R5847 | 86  | $\Delta E^\ddagger = 25 \text{ kcal/mol}$<br>$\Delta E = -20 \text{ kcal/mol}$ |  |
| R6490 | 159 | $\Delta E^\ddagger = 11 \text{ kcal/mol}$<br>$\Delta E = -14 \text{ kcal/mol}$ |  |
| R7201 | 19  | $\Delta E^\ddagger = 28 \text{ kcal/mol}$<br>$\Delta E = -8 \text{ kcal/mol}$  |  |
| R7207 | 19  | $\Delta E^\ddagger = 27 \text{ kcal/mol}$<br>$\Delta E = 0 \text{ kcal/mol}$   |  |
| R7885 | 21  | $\Delta E^\ddagger = 13 \text{ kcal/mol}$<br>$\Delta E = -47 \text{ kcal/mol}$ |  |
| R7931 | 135 | $\Delta E^\ddagger = 28 \text{ kcal/mol}$<br>$\Delta E = -2 \text{ kcal/mol}$  |  |
| R8367 | 79  | $\Delta E^\ddagger = 24 \text{ kcal/mol}$<br>$\Delta E = -2 \text{ kcal/mol}$  |  |
| R8701 | 58  | $\Delta E^\ddagger = 27 \text{ kcal/mol}$<br>$\Delta E = 19 \text{ kcal/mol}$  |  |



|        |     |                                                                |                                                                                     |
|--------|-----|----------------------------------------------------------------|-------------------------------------------------------------------------------------|
| R8713  | 115 | $\Delta E^\ddagger = 20$ kcal/mol<br>$\Delta E = 17$ kcal/mol  | 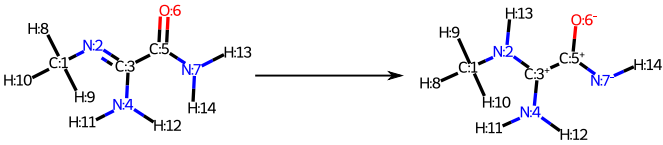  |
| R8816  | 47  | $\Delta E^\ddagger = 28$ kcal/mol<br>$\Delta E = -2$ kcal/mol  |   |
| R9011  | 140 | $\Delta E^\ddagger = 30$ kcal/mol<br>$\Delta E = 21$ kcal/mol  |   |
| R11611 | 28  | $\Delta E^\ddagger = 25$ kcal/mol<br>$\Delta E = -3$ kcal/mol  |   |
| R11630 | 106 | $\Delta E^\ddagger = 23$ kcal/mol<br>$\Delta E = -10$ kcal/mol |  |

Table S1: 30 target reactions with one-fragment reactants and barriers below 30 kcal/mol  
**Reactions colored in red:** IRC following re-optimization of the TS led to different reactant/product pair than the one stated.  
**Reactions colored in blue:** IRC following re-optimization of the TS led to a different stereoisomer of the reactant (rotation around C=N bond).  
R<sub>ID</sub> refers to the reaction labelling in [19](#) while the Reactant index refers to the indexing in Figure [S1](#)

| r <sub>ID</sub> | Reactant | Energetics                                                     | Reaction |
|-----------------|----------|----------------------------------------------------------------|----------|
| N11             | 14       | $\Delta E^\ddagger = 37$ kcal/mol<br>$\Delta E = 4$ kcal/mol   |          |
| N12             | 37       | $\Delta E^\ddagger = 43$ kcal/mol<br>$\Delta E = -44$ kcal/mol |          |
| N13             | 45       | $\Delta E^\ddagger = 35$ kcal/mol<br>$\Delta E = -18$ kcal/mol |          |
| N14             | 52       | $\Delta E^\ddagger = 39$ kcal/mol<br>$\Delta E = -21$ kcal/mol |          |
| N15             | 56       | $\Delta E^\ddagger = 37$ kcal/mol<br>$\Delta E = -34$ kcal/mol |          |
| N16             | 73       | $\Delta E^\ddagger = 42$ kcal/mol<br>$\Delta E = 32$ kcal/mol  |          |
| N17             | 73       | $\Delta E^\ddagger = 42$ kcal/mol<br>$\Delta E = -7$ kcal/mol  |          |
| N18             | 141      | $\Delta E^\ddagger = 33$ kcal/mol<br>$\Delta E = -22$ kcal/mol |          |

|     |     |                                                                                |                                                                                    |
|-----|-----|--------------------------------------------------------------------------------|------------------------------------------------------------------------------------|
| N19 | 141 | $\Delta E^\ddagger = 43 \text{ kcal/mol}$<br>$\Delta E = -31 \text{ kcal/mol}$ | 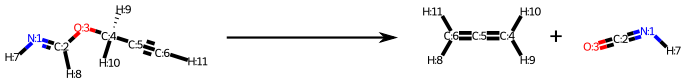 |
| N20 | 141 | $\Delta E^\ddagger = 38 \text{ kcal/mol}$<br>$\Delta E = 33 \text{ kcal/mol}$  |  |
| N21 | 150 | $\Delta E^\ddagger = 34 \text{ kcal/mol}$<br>$\Delta E = -3 \text{ kcal/mol}$  |  |

Table S2: 11 new reactions found with barriers above 30 kcal/mol - lower than existing reactions.

r<sub>ID</sub> refers to the reaction labelling used for new reactions while the Reactant index refers to the indexing of reactants in Figure [S1](#)

| r <sub>ID</sub> | Reactant | Energetics                                                     | Reaction |
|-----------------|----------|----------------------------------------------------------------|----------|
| N22             | 5        | $\Delta E^\ddagger = 32$ kcal/mol<br>$\Delta E = -21$ kcal/mol |          |
| N23             | 8        | $\Delta E^\ddagger = 46$ kcal/mol<br>$\Delta E = -7$ kcal/mol  |          |
| N24             | 8        | $\Delta E^\ddagger = 48$ kcal/mol<br>$\Delta E = -4$ kcal/mol  |          |
| N25             | 8        | $\Delta E^\ddagger = 47$ kcal/mol<br>$\Delta E = 1$ kcal/mol   |          |
| N26             | 8        | $\Delta E^\ddagger = 49$ kcal/mol<br>$\Delta E = 43$ kcal/mol  |          |
| N27             | 12       | $\Delta E^\ddagger = 42$ kcal/mol<br>$\Delta E = -5$ kcal/mol  |          |
| N28             | 19       | $\Delta E^\ddagger = 66$ kcal/mol<br>$\Delta E = -1$ kcal/mol  |          |
| N29             | 21       | $\Delta E^\ddagger = 39$ kcal/mol<br>$\Delta E = -65$ kcal/mol |          |

|     |     |                                                                |                                                                                      |
|-----|-----|----------------------------------------------------------------|--------------------------------------------------------------------------------------|
| N30 | 23  | $\Delta E^\ddagger = 58$ kcal/mol<br>$\Delta E = 30$ kcal/mol  | 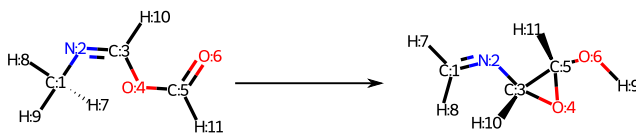   |
| N31 | 34  | $\Delta E^\ddagger = 40$ kcal/mol<br>$\Delta E = 14$ kcal/mol  |    |
| N32 | 63  | $\Delta E^\ddagger = 47$ kcal/mol<br>$\Delta E = 0$ kcal/mol   |    |
| N33 | 71  | $\Delta E^\ddagger = 53$ kcal/mol<br>$\Delta E = -21$ kcal/mol |    |
| N34 | 79  | $\Delta E^\ddagger = 36$ kcal/mol<br>$\Delta E = -3$ kcal/mol  |   |
| N35 | 88  | $\Delta E^\ddagger = 63$ kcal/mol<br>$\Delta E = 13$ kcal/mol  |  |
| N36 | 115 | $\Delta E^\ddagger = 37$ kcal/mol<br>$\Delta E = 13$ kcal/mol  |  |

Table S3: 15 new reactions found with barriers over 30 kcal/mol. Note that Grambow et al reported a reaction to another diastereomer of the product of N32. We include it here because we saw a significantly lower barrier than the reported (55 kcal/mol).

r<sub>1D</sub> refers to the reaction labelling used for new reactions while the Reactant index refers to the indexing of reactants in Figure [S1](#)

| R <sub>ID</sub> | Reactant | Energetics                                                     | Reaction |
|-----------------|----------|----------------------------------------------------------------|----------|
| R129            | 1        | $\Delta E^\ddagger = 8$ kcal/mol<br>$\Delta E = -34$ kcal/mol  |          |
| R5946           | 2        | $\Delta E^\ddagger = 14$ kcal/mol<br>$\Delta E = -44$ kcal/mol |          |
| R2793           | 3        | $\Delta E^\ddagger = 10$ kcal/mol<br>$\Delta E = -24$ kcal/mol |          |
| R1689           | 4        | $\Delta E^\ddagger = 20$ kcal/mol<br>$\Delta E = 5$ kcal/mol   |          |
| R4870           | 5        | $\Delta E^\ddagger = 15$ kcal/mol<br>$\Delta E = -19$ kcal/mol |          |
| R2042           | 6        | $\Delta E^\ddagger = 19$ kcal/mol<br>$\Delta E = -62$ kcal/mol |          |
| R2191           | 7        | $\Delta E^\ddagger = 19$ kcal/mol<br>$\Delta E = -46$ kcal/mol |          |
| R2353           | 8        | $\Delta E^\ddagger = 20$ kcal/mol<br>$\Delta E = -39$ kcal/mol |          |

|        |    |                                                                                |  |
|--------|----|--------------------------------------------------------------------------------|--|
| R2858  | 9  | $\Delta E^\ddagger = 19 \text{ kcal/mol}$<br>$\Delta E = -52 \text{ kcal/mol}$ |  |
| R6677  | 10 | $\Delta E^\ddagger = 20 \text{ kcal/mol}$<br>$\Delta E = -34 \text{ kcal/mol}$ |  |
| R1110  | 11 | $\Delta E^\ddagger = 28 \text{ kcal/mol}$<br>$\Delta E = 8 \text{ kcal/mol}$   |  |
| R7854  | 12 | $\Delta E^\ddagger = 21 \text{ kcal/mol}$<br>$\Delta E = -58 \text{ kcal/mol}$ |  |
| R73    | 13 | $\Delta E^\ddagger = 28 \text{ kcal/mol}$<br>$\Delta E = -33 \text{ kcal/mol}$ |  |
| R11240 | 14 | $\Delta E^\ddagger = 26 \text{ kcal/mol}$<br>$\Delta E = -38 \text{ kcal/mol}$ |  |
| R11355 | 15 | $\Delta E^\ddagger = 25 \text{ kcal/mol}$<br>$\Delta E = -48 \text{ kcal/mol}$ |  |
| R11396 | 16 | $\Delta E^\ddagger = 28 \text{ kcal/mol}$<br>$\Delta E = -56 \text{ kcal/mol}$ |  |
| R11478 | 17 | $\Delta E^\ddagger = 25 \text{ kcal/mol}$<br>$\Delta E = -44 \text{ kcal/mol}$ |  |

|        |    |                                                                                |                                                                                    |
|--------|----|--------------------------------------------------------------------------------|------------------------------------------------------------------------------------|
| R10077 | 18 | $\Delta E^\ddagger = 10 \text{ kcal/mol}$<br>$\Delta E = -39 \text{ kcal/mol}$ | 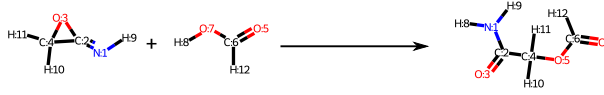 |
| R10514 | 19 | $\Delta E^\ddagger = 25 \text{ kcal/mol}$<br>$\Delta E = -33 \text{ kcal/mol}$ |  |
| R8426  | 20 | $\Delta E^\ddagger = 26 \text{ kcal/mol}$<br>$\Delta E = -39 \text{ kcal/mol}$ |  |

Table S4: 20 target reactions with two-fragment reactants and barriers below 30 kcal/mol. R<sub>ID</sub> refers to the reaction labelling in [19](#) while the Reactant index will be used to refer to the reactant of the reaction



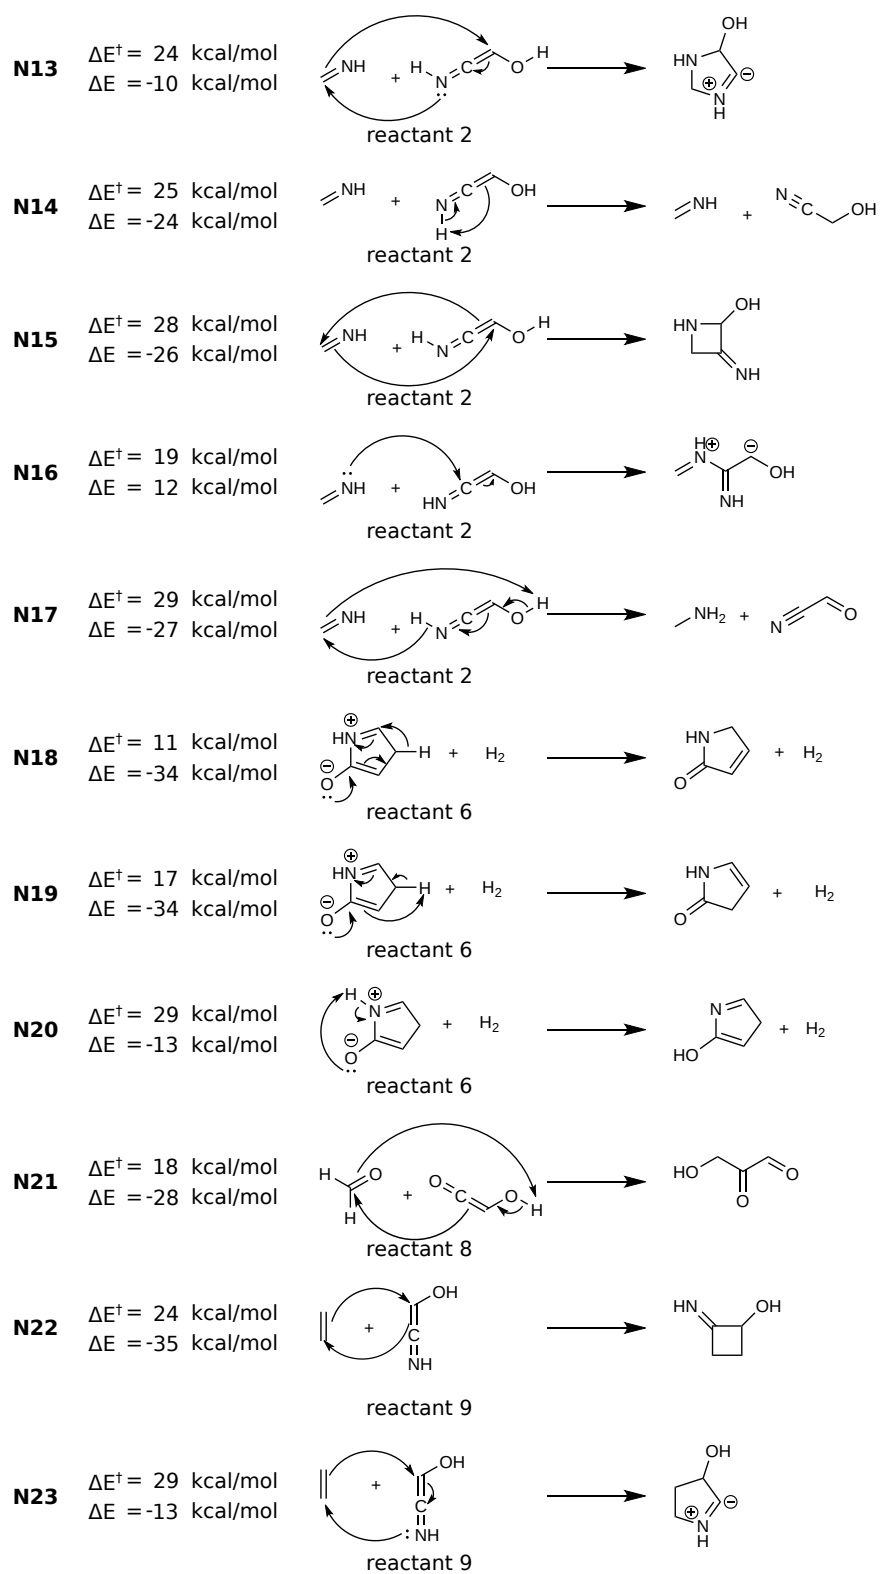

Figure S2

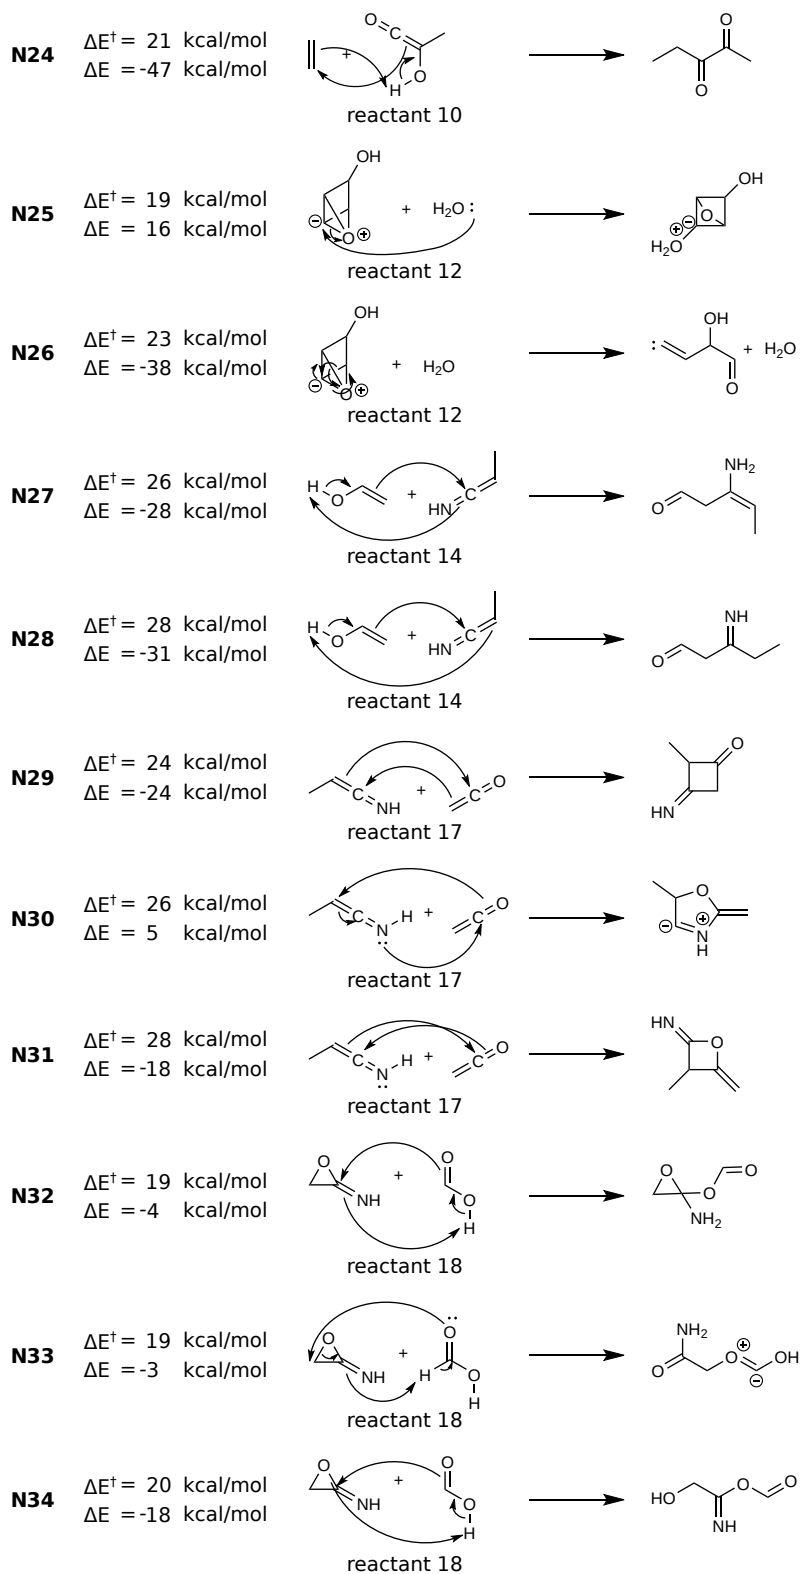

Figure S2: (continued)

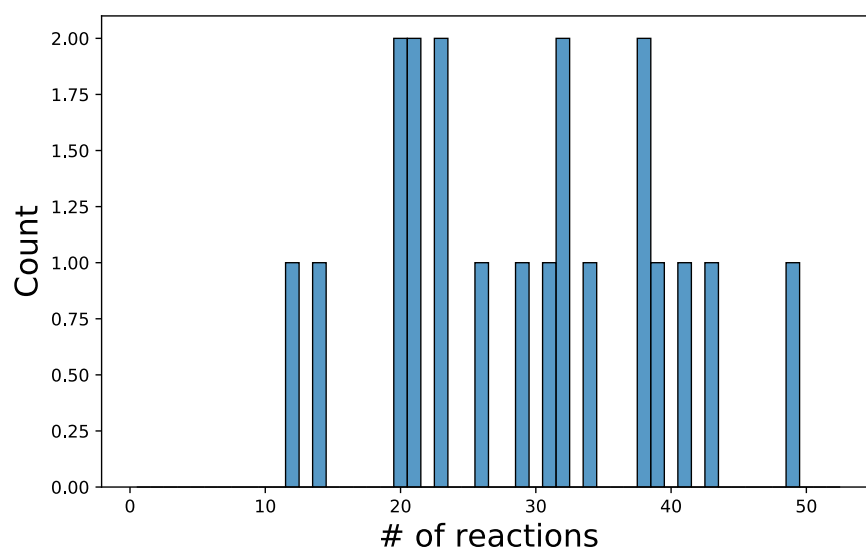

Figure S3: Distribution of the number of different reactions found during the 100 meta-MD runs (with default hyperparameter set) for the 20 bimolecular reactants. The average is 29.3 reactions/reactant.
